# Supplementary material for: High Efficacy of Ozonated Oils on the Removal of Biofilms Produced by Methicillin-Resistant Staphylococcus aureus (MRSA) from Infected Diabetic Foot Ulcers
Source: PubMed Central journal article supplement (PMC7464232; doi:10.3390/molecules25163601), 2020-08-07
Supplement: molecules-25-03601-s001.pdf [file molecules-25-03601-s001.pdf]

Article

# High Efficacy of Ozonated Oils on the Removal of Biofilms Produced by Methicillin-Resistant *Staphylococcus aureus* (MRSA) from Infected Diabetic Foot Ulcers

Vanessa Silva <sup>1,2,3,4</sup>, Cecília Peirone <sup>5,6,7</sup>, Joana S. Amaral <sup>8,9</sup>, Rosa Capita <sup>10,11</sup>, Carlos Alonso-Calleja <sup>10,11</sup>, Jose A. Marques-Magallanes <sup>12</sup>, Ângela Martins <sup>13</sup>, Águeda Carvalho <sup>6</sup>, Luís Maltez <sup>5,14</sup>, José Eduardo Pereira <sup>5,14</sup>, José Luís Capelo <sup>15,16</sup>, Gilberto Igrejas <sup>2,3,4</sup>, and Patrícia Poeta <sup>1,4,\*</sup>

- <sup>1</sup> Microbiology and Antibiotic Resistance Team (MicroART), Department of Veterinary Sciences, University of Trás-os-Montes and Alto Douro (UTAD), 5000-801 Vila Real, Portugal; vanessasilva@utad.pt
  - <sup>2</sup> Department of Genetics and Biotechnology, University of Trás-os-Montes and Alto Douro, 5000-801 Vila Real, Portugal; gigrejas@utad.pt
  - <sup>3</sup> Functional Genomics and Proteomics Unit, University of Trás-os-Montes and Alto Douro (UTAD), 5000-801 Vila Real, Portugal
  - <sup>4</sup> Associated Laboratory for Green Chemistry (LAQV-REQUIMTE), University NOVA of Lisboa, Lisboa, 2829-516 Caparica, Portugal
  - <sup>5</sup> Department of Veterinary Sciences, University of Trás-os-Montes and Alto Douro (UTAD), 5000-801 Vila Real, Portugal; cecilia\_peirone@yahoo.com.ar (C.P.); lmaltez@utad.pt (L.M.); jeduardo@utad.pt (J.E.P.)
  - <sup>6</sup> Hospital Center of Trás-os-Montes and Alto Douro E.P.E., 5000-185 Vila Real, Portugal; aguedasencarvalho@gmail.com
  - <sup>7</sup> Centre for the Research and Technology of Agro-Environmental and Biological Sciences (CITAB), UTAD, 5000-801 Vila Real, Portugal
  - <sup>8</sup> Centro de Investigação de Montanha (CIMO), Instituto Politécnico de Bragança, 5300-253 Bragança, Portugal; jamaral@ipb.pt
  - <sup>9</sup> REQUIMTE-LAQV, Department of Chemical Sciences, Pharmacy Faculty, University of Porto, 4050-313 Porto, Portugal
  - <sup>10</sup> Department of Food Hygiene and Technology, Veterinary Faculty, University of León, E-24071 León, Spain; rosa.capita@unileon.es (R.C.); carlos.alonso.calleja@unileon.es (C.A.-C.)
  - <sup>11</sup> Institute of Food Science and Technology, University of León, 24004 León, Spain
  - <sup>12</sup> Critical Care Department, University Hospital Braga, 4710-243 Braga, Portugal; jose.regojo@yahoo.com
  - <sup>13</sup> Department of Zootecnics, University of Trás-os-Montes and Alto Douro (UTAD), 5000-801 Vila Real, Portugal; angela@utad.pt
  - <sup>14</sup> Veterinary and Animal Research Centre, University of Trás-os-Montes and Alto Douro (UTAD), 5000-801 Vila Real, Portugal
  - <sup>15</sup> BIOSCOPE Group, LAQV@REQUIMTE, Chemistry Department, Faculty of Science and Technology, NOVA University of Lisbon, 2825-466 Almada, Portugal; jlcm@fct.unl.pt
  - <sup>16</sup> Proteomass Scientific Society, 2825-466 Costa de Caparica, Portugal
- \* Correspondence: ppoeta@utad.pt; Phone: (+351)-259350466; FAX: (+351)-259350629

**Table S1.** Correlation coefficients between all data of fatty acids and peroxide values.

|                 | C14:0 | C16:0 | C16:1 | C17:0 | C17:1 | C18:0 | C18:1n9c | C18:1n7 | C18:2n6c | C20:0 | C20:1 | C18:3n3 | C22:0 | C24:0 | IP    |
|-----------------|-------|-------|-------|-------|-------|-------|----------|---------|----------|-------|-------|---------|-------|-------|-------|
| <b>C14:0</b>    |       | 0,90  | -0,24 | 0,93  | 0,99  | 0,84  | -0,95    | -0,97   | -0,87    | 0,43  | -0,49 | -0,92   | 0,72  | 0,80  | 0,88  |
| <b>C16:0</b>    | ***   |       | -0,52 | 0,99  | 0,87  | 0,99  | -0,99    | -0,97   | -0,99    | 0,69  | -0,79 | -0,96   | 0,95  | 0,96  | 0,96  |
| <b>C16:1</b>    | ns    | *     |       | -0,49 | -0,16 | -0,58 | 0,45     | 0,42    | 0,58     | -0,46 | 0,77  | 0,43    | -0,70 | -0,50 | -0,56 |
| <b>C17:0</b>    | ***   | ***   | ns    |       | 0,90  | 0,98  | -1,00    | -0,99   | -0,99    | 0,64  | -0,76 | -0,97   | 0,92  | 0,94  | 0,96  |
| <b>C17:1</b>    | ***   | ***   | ns    | ***   |       | 0,80  | -0,92    | -0,95   | -0,83    | 0,37  | -0,43 | -0,90   | 0,67  | 0,76  | 0,85  |
| <b>C18:0</b>    | ***   | ***   | *     | ***   | ***   |       | -0,96    | -0,93   | -0,99    | 0,74  | -0,86 | -0,94   | 0,98  | 0,97  | 0,94  |
| <b>C18:1n9c</b> | ***   | ***   | ns    | ***   | ***   | ***   |          | 0,99    | 0,98     | -0,62 | 0,74  | 0,98    | -0,90 | -0,93 | -0,96 |
| <b>C18:1n7</b>  | ***   | ***   | ns    | ***   | ***   | ***   | ***      |         | 0,96     | -0,55 | 0,68  | 0,97    | -0,85 | -0,89 | -0,95 |
| <b>C18:2n6c</b> | ***   | ***   | *     | ***   | ***   | ***   | ***      | ***     |          | -0,70 | 0,85  | 0,96    | -0,96 | -0,96 | -0,96 |
| <b>C20:0</b>    | ns    | **    | ns    | **    | ns    | **    | *        | *       | **       |       | -0,72 | -0,59   | 0,78  | 0,81  | 0,66  |
| <b>C20:1</b>    | ns    | ***   | ***   | **    | ns    | ***   | **       | **      | ***      | **    |       | 0,74    | -0,92 | -0,81 | -0,76 |
| <b>C18:3n3</b>  | ***   | ***   | ns    | ***   | ***   | ***   | ***      | ***     | ***      | *     | **    |         | -0,87 | -0,90 | -0,91 |
| <b>C22:0</b>    | **    | ***   | **    | ***   | **    | ***   | ***      | ***     | ***      | ***   | ***   | ***     |       | 0,95  | 0,90  |
| <b>C24:0</b>    | ***   | ns    | ***   | ***   | ***   | ***   | ***      | ***     | ***      | ***   | ***   | ***     | ***   |       | 0,88  |
| <b>IP</b>       | ***   | ***   | *     | ***   | ***   | ***   | ***      | ***     | ***      | *     | ***   | ***     | ***   | ***   |       |

$p > 0.05$  not significant (ns);  $0,01 < p < 0.05$  \*;  $0,001 < p < 0.01$  \*\*;  $p < 0.001$  \*\*\*. There is no statistically significant correlation ( $p > 0.05$ ) between C14: 0 and C16: 1; with C20: 0 and C20: 1. There is no statistically significant correlation ( $p > 0.05$ ) between C16: 0 and C24: 0. There is no statistically significant correlation ( $p > 0.05$ ) between C16: 1 and C17: 0.; C17: 1; C18: 1n9c; C18: 1n7; C20: 0 and C18: 3n3. There is no statistically significant correlation ( $p > 0.05$ ) between C17: 1 with C20: 0 and C20: 1. The association between C14: 0 is positive and high with C16: 0, C17: 0, C18: 0, C22: 0, C24: 0 and IP. With the remaining fatty acids it is negative (as one increases, the other decreases).
